# Supplementary material
Source: ML conference proceedings conference paper supplement (https://proceedings.neurips.cc/paper_files/paper/2018/hash/0f840be9b8db4d3fbd5ba2ce59211f55-Abstract.html)
Supplement: Supplementary file [file 0f840be9b8db4d3fbd5ba2ce59211f55-Supplemental.zip]

## Appendix for “Random Feature Stein Discrepancies”

### A Proof of Proposition 3.1: KSD- $\Phi$ SD inequality

We apply the generalized Hölder’s inequality and the Babenko-Beckner inequality in turn to find

$$\begin{aligned} \text{KSD}_k^2(Q_N, P) &= \sum_{d=1}^D \int |\mathcal{F}(Q_N(\mathcal{T}_d\Phi))(\omega)|^2 \rho(\omega) d\omega \leq \|\rho\|_{L^t} \sum_{d=1}^D \|\mathcal{F}(Q_N(\mathcal{T}_d\Phi))\|_{L^s}^2 \\ &\leq c_{r,d}^2 \|\rho\|_{L^t} \sum_{d=1}^D \|Q_N(\mathcal{T}_d\Phi)\|_{L^r}^2 = c_{r,d}^2 \|\rho\|_{L^t} \Phi\text{SD}_{\Phi,r}^2(Q_N, P), \end{aligned}$$

where  $t = \frac{r}{2-r}$  and  $c_{r,d} := (r^{1/r}/s^{1/s})^{d/2} \leq 1$  for  $s = r/(r-1)$ .

### B Proof of Theorem 3.2: Tilted KSDs detect non-convergence

For any vector-valued function  $f$ , let  $M_1(f) = \sup_{x,y:\|x-y\|_2=1} \|f(x) - f(y)\|_2$ . The result will follow from the following theorem which provides an upper bound on the bounded Lipschitz metric  $d_{BL\|\cdot\|_2}(\mu, P)$  in terms of the KSD and properties of  $A$  and  $\Psi$ . Let  $b := \nabla \log p$ .

**Theorem B.1** (Tilted KSD lower bound). *Suppose  $P \in \mathcal{P}$  and  $k(x, y) = A(x)\Psi(x - y)A(y)$  for  $\Psi \in C^2$  and  $A \in C^1$  with  $A > 0$  and  $\nabla \log A$  bounded and Lipschitz. Then there exists a constant  $\mathcal{M}_P$  such that, for all  $\epsilon > 0$  and all probability measures  $\mu$ ,*

$$d_{BL\|\cdot\|_2}(\mu, P) \leq \epsilon + C \text{KSD}_k(\mu, P),$$

where

$$C := (2\pi)^{-d/4} \|1/A\|_{L^2} \mathcal{M}_P H(\mathbb{E}[\|G\|_2 B(G)](1 + M_1(\log A) + \mathcal{M}_P M_1(b + \nabla \log A))\epsilon^{-1})^{1/2},$$

$$H(t) := \sup_{\omega \in \mathbb{R}^d} e^{-\|\omega\|_2^2/(2t^2)} / \hat{\Psi}(\omega), \quad G \text{ is a standard Gaussian vector; and } B(y) := \sup_{x \in \mathbb{R}^d, u \in [0,1]} A(x)/A(x + uy).$$

**Remarks** By bounding  $H$  and optimizing over  $\epsilon$ , one can derive rates of convergence in  $d_{BL\|\cdot\|_2}$ . Thm. 5 and Sec. 4.2 of Gorham et al. [12] provide an explicit value for the Stein factor  $\mathcal{M}_P$ .

Let  $A_\mu(x) = A(x - \mathbb{E}_{X \sim \mu}[X])$ . Since  $\|1/A\|_{L^2} = \|1/A_\mu\|_{L^2}$ ,  $M_1(\log A_\mu) \leq M_1(\log A)$ ,  $M_1(\nabla \log A_\mu) \leq M_1(\nabla \log A)$ , and  $\sup_{x \in \mathbb{R}^d, u \in [0,1]} A_\mu(x)/A_\mu(x + uy) = B(y)$ , the exact conclusion of Theorem B.1 also holds when  $k(x, y) = A_\mu(x)\Psi(x - y)A_\mu(y)$ . Moreover, since  $\log A$  is Lipschitz,  $B(y) \leq e^{\|y\|_2}$  so  $\mathbb{E}[\|G\|_2 B(G)]$  is finite. Now suppose  $\text{KSD}_k(\mu_N, P) \rightarrow 0$  for a sequence of probability measures  $(\mu_N)_{N \geq 1}$ . For any  $\epsilon > 0$ ,  $\limsup_n d_{BL\|\cdot\|_2}(\mu_N, P) \leq \epsilon$ , since  $H(t)$  is finite for all  $t > 0$ . Hence,  $d_{BL\|\cdot\|_2}(\mu_N, P) \rightarrow 0$ , and, as  $d_{BL\|\cdot\|_2}$  metrizes weak convergence,  $\mu_N \Rightarrow P$ .

#### B.1 Proof of Theorem B.1: Tilted KSD lower bound

Our proof parallels that of [11, Thm. 13]. Fix any  $h \in BL\|\cdot\|_2$ . Since  $A \in C^1$  is positive, Thm. 5 and Sec. 4.2 of Gorham et al. [12] imply that there exists a  $g \in C^1$  which solves the Stein equation  $\mathcal{T}_P(Ag) = h - \mathbb{E}_P[h(Z)]$  and satisfies  $M_0(Ag) \leq \mathcal{M}_P$  for  $\mathcal{M}_P$  a constant independent of  $A, h$ , and  $g$ . Since  $1/A \in L^2$ , we have  $\|g\|_{L^2} \leq \mathcal{M}_P \|1/A\|_{L^2}$ .

Since  $\nabla \log A$  is bounded,  $A(x) \leq \exp(\gamma\|x\|)$  for some  $\gamma$ . Moreover, any measure in  $\mathcal{P}$  is sub-Gaussian, so  $P$  has finite exponential moments. Hence, since  $A$  is also positive, we may define the tilted probability measure  $P_A$  with density proportional to  $Ap$ . The identity  $\mathcal{T}_P(Ag) = A\mathcal{T}_{P_A}g$  implies that

$$M_0(A\nabla \mathcal{T}_{P_A}g) = M_0(\nabla \mathcal{T}_P(Ag) - \mathcal{T}_P(Ag)\nabla \log A) \leq 1 + M_1(\log A).$$

Since  $b$  and  $\nabla \log A$  are Lipschitz, we may apply the following lemma, proved in Appendix B.2 to deduce that there is a function  $g_\epsilon \in \mathcal{K}_{k_1}^d$  for  $k_1(x, y) := \Psi(x - y)$  such that  $|(\mathcal{T}_P(Ag_\epsilon))(x) - (\mathcal{T}_P(Ag))(x)| = A(x)|(\mathcal{T}_{P_A}g_\epsilon)(x) - (\mathcal{T}_{P_A}g)(x)| \leq \epsilon$  for all  $x$  with norm

$$\|g_\epsilon\|_{\mathcal{K}_{k_1}^d} \tag{4}$$

$$\leq (2\pi)^{-d/4} H(\mathbb{E}[\|G\|_2 B(G)](1 + M_1(\log A) + \mathcal{M}_P M_1(b + \nabla \log A))\epsilon^{-1})^{1/2} \|1/A\|_{L^2} \mathcal{M}_P.$$

**Lemma B.2** (Stein approximations with finite RKHS norm). *Consider a function  $A : \mathbb{R}^d \rightarrow \mathbb{R}$  satisfying  $B(y) := \sup_{x \in \mathbb{R}^d, u \in [0,1]} A(x)/A(x+uy)$ . Suppose  $g : \mathbb{R}^d \rightarrow \mathbb{R}^d$  is in  $L^2 \cap C^1$ . If  $P$  has Lipschitz log density, and  $k(x, y) = \Psi(x-y)$  for  $\Psi \in C^2$  with generalized Fourier transform  $\hat{\Psi}$ , then for every  $\epsilon \in (0, 1]$ , there is a function  $g_\epsilon : \mathbb{R}^d \rightarrow \mathbb{R}^d$  such that  $|(\mathcal{T}_P g_\epsilon)(x) - (\mathcal{T}_P g)(x)| \leq \epsilon/A(x)$  for all  $x \in \mathbb{R}^d$  and*

$$\|g_\epsilon\|_{\mathcal{K}_k^d} \leq (2\pi)^{-d/4} H(\mathbb{E}[\|G\|_2 B(G)](M_0(A\nabla \mathcal{T}_P g) + M_0(Ag)M_1(b))\epsilon^{-1})^{1/2} \|g\|_{L^2},$$

where  $H(t) := \sup_{\omega \in \mathbb{R}^d} e^{-\|\omega\|_2^2/(2t^2)}/\hat{\Psi}(\omega)$  and  $G$  is a standard Gaussian vector.

Since  $\|Ag_\epsilon\|_{\mathcal{K}_k^d} = \|g_\epsilon\|_{\mathcal{K}_{k_1}^d}$ , the triangle inequality and the definition of the KSD now yield

$$\begin{aligned} |\mathbb{E}_\mu[h(X)] - \mathbb{E}_P[h(Z)]| &= |\mathbb{E}_\mu[(\mathcal{T}_P(Ag))(X)]| \\ &\leq |\mathbb{E}[(\mathcal{T}_P(Ag))(X) - (\mathcal{T}_P(Ag_\epsilon))(X)]| + |\mathbb{E}_\mu[(\mathcal{T}_P(Ag_\epsilon))(X)]| \\ &\leq \epsilon + \|g_\epsilon\|_{\mathcal{K}_{k_1}^d} \text{KSD}_k(\mu, P). \end{aligned}$$

The advertised conclusion follows by applying the bound (4) and taking the supremum over all  $h \in BL_{\|\cdot\|}$ .

## B.2 Proof of Lemma B.2: Stein approximations with finite RKHS norm

Assume  $M_0(A\nabla \mathcal{T}_P g) + M_0(Ag) < \infty$ , as otherwise the claim is vacuous. Our proof parallels that of Gorham and Mackey [11, Lem. 12]. Let  $Y$  denote a standard Gaussian vector with density  $\rho$ . For each  $\delta \in (0, 1]$ , we define  $\rho_\delta(x) = \delta^{-d} \rho(x/\delta)$ , and for any function  $f$  we write  $f_\delta(x) \triangleq \mathbb{E}[f(x + \delta Y)]$ . Under our assumptions on  $h = \mathcal{T}_P g$  and  $B$ , the mean value theorem and Cauchy-Schwarz imply that for each  $x \in \mathbb{R}^d$  there exists  $u \in [0, 1]$  such that

$$\begin{aligned} |h_\delta(x) - h(x)| &= |\mathbb{E}_\rho[h(x + \delta Y) - h(x)]| = |\mathbb{E}_\rho[\langle \delta Y, \nabla h(x + \delta Y u) \rangle]| \\ &\leq \delta M_0(A\nabla \mathcal{T}_P g) \mathbb{E}_\rho[\|Y\|_2/A(x + \delta Y u)] \leq \delta M_0(A\nabla \mathcal{T}_P g) \mathbb{E}_\rho[\|Y\|_2 B(Y)]/A(x). \end{aligned}$$

Now, for each  $x \in \mathbb{R}^d$  and  $\delta > 0$ ,

$$\begin{aligned} h_\delta(x) &= \mathbb{E}_\rho[\langle b(x + \delta Y), g(x + \delta Y) \rangle] + \mathbb{E}[\langle \nabla, g(x + \delta Y) \rangle] \quad \text{and} \\ (\mathcal{T}_P g)_\delta(x) &= \mathbb{E}_\rho[\langle b(x), g(x + \delta Y) \rangle] + \mathbb{E}[\langle \nabla, g(x + \delta Y) \rangle], \end{aligned}$$

so, by Cauchy-Schwarz, the Lipschitzness of  $b$ , and our assumptions on  $g$  and  $B$ ,

$$\begin{aligned} |(\mathcal{T}_P g)_\delta(x) - h_\delta(x)| &= |\mathbb{E}_\rho[\langle b(x) - b(x + \delta Y), g(x + \delta Y) \rangle]| \\ &\leq \mathbb{E}_\rho[\|b(x) - b(x + \delta Y)\|_2 \|g(x + \delta Y)\|_2] \\ &\leq M_0(Ag)M_1(b) \delta \mathbb{E}_\rho[\|Y\|_2/A(x + \delta Y)] \leq M_0(Ag)M_1(b) \delta \mathbb{E}_\rho[\|Y\|_2 B(Y)]/A(x). \end{aligned}$$

Thus, if we fix  $\epsilon > 0$  and define  $\tilde{\epsilon} = \epsilon/(\mathbb{E}_\rho[\|Y\|_2 B(Y)](M_0(A\nabla \mathcal{T}_P g) + M_0(Ag)M_1(b)))$ , the triangle inequality implies

$$|(\mathcal{T}_P g_{\tilde{\epsilon}})(x) - (\mathcal{T}_P g)(x)| \leq |(\mathcal{T}_P g_{\tilde{\epsilon}})(x) - h_{\tilde{\epsilon}}(x)| + |h_{\tilde{\epsilon}}(x) - h(x)| \leq \epsilon/A(x).$$

To conclude, we will bound  $\|g_\delta\|_{\mathcal{K}_k^d}$ . By Wendland [29, Thm. 10.21],

$$\begin{aligned} \|g_\delta\|_{\mathcal{K}_k^d}^2 &= (2\pi)^{-d/2} \int_{\mathbb{R}^d} \frac{|\hat{g}_\delta(\omega)|^2}{\hat{\Phi}(\omega)} d\omega = (2\pi)^{d/2} \int_{\mathbb{R}^d} \frac{|\hat{g}(\omega)|^2 \hat{\rho}_\delta(\omega)^2}{\hat{\Phi}(\omega)} d\omega \\ &\leq (2\pi)^{-d/2} \left\{ \sup_{\omega \in \mathbb{R}^d} \frac{e^{-\|\omega\|_2^2 \delta^2/2}}{\hat{\Phi}(\omega)} \right\} \int_{\mathbb{R}^d} |\hat{g}(\omega)|^2 d\omega, \end{aligned}$$

where we have used the Convolution Theorem [29, Thm. 5.16] and the identity  $\hat{\rho}_\delta(\omega) = \hat{\rho}(\delta\omega)$ . Finally, an application of Plancherel's theorem [14, Thm. 1.1] gives  $\|g_\delta\|_{\mathcal{K}_k^d} \leq (2\pi)^{-d/4} F(\delta^{-1})^{1/2} \|g\|_{L^2}$ .

### C Proof of Proposition 3.3

We begin by establishing the  $\Phi$ SD convergence claim. Define the target mean  $m_P := \mathbb{E}_{Z \sim P}[Z]$ . Since  $\log A$  is Lipschitz and  $A > 0$ ,  $A_N \leq Ae^{m_N}$  and hence  $P(A_N) < \infty$  and  $\mathbb{E}_P[A_N(Z)\|Z\|_2^2] < \infty$  for all  $N$  by our integrability assumptions on  $P$ .

Suppose  $\mathcal{W}_{A_N}(Q_N, P) \rightarrow 0$ , and, for any probability measure  $\mu$  with  $\mu(A_N) < \infty$ , define the tilted probability measure  $\mu_{A_N}$  via  $d\mu_{A_N}(x) = d\mu(x)A_N(x)$ . By the definition of  $\mathcal{W}_{A_N}$ , we have  $|Q_N(A_N h) - P(A_N h)| \rightarrow 0$  for all  $h \in \mathcal{H}$ . In particular, since the constant function  $h(x) = 1$  is in  $\mathcal{H}$ , we have  $|Q_N(A_N) - P(A_N)| \rightarrow 0$ . In addition, since the functions  $f_N(x) = (x - m_N)/A_N(x)$  are uniformly Lipschitz in  $N$ , we have  $m_N - m_P = Q_N(f_N) - P(f_N) \rightarrow 0$  and thus  $A_N \rightarrow A_P$  for  $A_P(x) := A(x - m_P) > 0$ . Therefore,  $P(A_N) \rightarrow P(A_P) > 0$ , and, as  $x/y$  is a continuous function of  $(x, y)$  when  $y > 0$ , we have

$$Q_{N,A_N}(h) - P_{A_N}(h) = Q_N(A_N h)/Q_N(A_N) - P(A_N h)/P(A_N) \rightarrow 0$$

and hence the 1-Wasserstein distance  $d_{\mathcal{H}}(Q_{N,A_N}, P_{A_N}) \rightarrow 0$ .

Now note that, for any  $g \in \mathcal{G}_{\Phi/A_N, r}$ ,

$$\begin{aligned} Q_N(\mathcal{T}_{A_N} g) &= Q_N(A_N \mathcal{T}_{P_{A_N}} g) = Q_N(A_N) Q_{N,A_N}(\mathcal{T}_{P_{A_N}} g) \\ &= ((Q_N(A_N) - P(A_N)) + P(A_N)) Q_{N,A_N}(\mathcal{T}_{P_{A_N}} g) \\ &\leq (\mathcal{W}_{A_N}(Q_N, P) + P(A_N)) Q_{N,A_N}(\mathcal{T}_{P_{A_N}} g) \end{aligned}$$

where  $\mathcal{T}_{P_{A_N}}$  is the Langevin operator for the tilted measure  $P_{A_N}$ , defined by

$$(\mathcal{T}_{P_{A_N}} g)(x) = \sum_{d=1}^D (p(x) A_N(x))^{-1} \partial_{x_d} (p(x) A_N(x) g_d(x)).$$

Taking a supremum over  $g \in \mathcal{G}_{\Phi/A_N, r}$ , we find

$$\Phi\text{SD}_{\Phi, r}(Q_N, P) \leq (\mathcal{W}_{A_N}(Q_N, P) + P(A_N)) \Phi\text{SD}_{\Phi/A_N, r}(Q_{N,A_N}, P_{A_N}).$$

Furthermore, since  $\Phi(x, z)/A_N(x) = F(x - z)$ , Hölder's inequality implies

$$\begin{aligned} \sup_{x \in \mathbb{R}^D} \|g(x)\|_{\infty} &\leq \|F\|_{L^r}, \\ \sup_{x \in \mathbb{R}^D, d \in [D]} \|\partial_{x_d} g(x)\|_{\infty} &\leq \|\partial_{x_d} F\|_{L^r}, \quad \text{and} \\ \sup_{x \in \mathbb{R}^D, d, d' \in [D]} \|\partial_{x_d} \partial_{x_{d'}} g(x)\|_{\infty} &\leq \|\partial_{x_d} \partial_{x_{d'}} F\|_{L^r} \end{aligned}$$

for each  $g \in \mathcal{G}_{\Phi/A_N, r}$ . Since  $\nabla \log p$  and  $\nabla \log A_N$  are Lipschitz and  $\mathbb{E}_P[A_N(Z)\|Z\|_2^2] < \infty$ , we may therefore apply [11, Lem. 18] to discover that  $\Phi\text{SD}_{\Phi/A_N, r}(Q_{N,A_N}, P_{A_N}) \rightarrow 0$  and hence  $\Phi\text{SD}_{\Phi, r}(Q_N, P) \rightarrow 0$  whenever the 1-Wasserstein distance  $d_{\mathcal{H}}(Q_{N,A_N}, P_{A_N}) \rightarrow 0$ .

To see that  $\text{R}\Phi\text{SD}_{\Phi, r, \nu_N, M_N}^2(Q_N, P) \xrightarrow{P} 0$  whenever  $\Phi\text{SD}_{\Phi, r}^2(Q_N, P) \rightarrow 0$ , first note that since  $r \in [1, 2]$ , we may apply Jensen's inequality to obtain

$$\begin{aligned} \mathbb{E}[\text{R}\Phi\text{SD}_{\Phi, r, \nu_N, M_N}^2(Q_N, P)] &= \mathbb{E}[\sum_{d=1}^D (\frac{1}{M} \sum_{m=1}^M \nu_N(Z_m)^{-1} |Q_N(\mathcal{T}_d \Phi)(Z_m)|^r)^{2/r}] \\ &\leq \sum_{d=1}^D (\mathbb{E}[\frac{1}{M} \sum_{m=1}^M \nu_N(Z_m)^{-1} |Q_N(\mathcal{T}_d \Phi)(Z_m)|^r])^{2/r} \\ &= \Phi\text{SD}_{\Phi, r}^2(Q_N, P). \end{aligned}$$

Hence, by Markov's inequality, for any  $\epsilon > 0$ ,

$$\mathbb{P}[\text{R}\Phi\text{SD}_{\Phi, r, \nu_N, M_N}^2(Q_N, P) > \epsilon] \leq \mathbb{E}[\text{R}\Phi\text{SD}_{\Phi, r, \nu_N, M_N}^2(Q_N, P)]/\epsilon \leq \Phi\text{SD}_{\Phi, r}^2(Q_N, P)/\epsilon \rightarrow 0,$$

yielding the result.

## D Proof of Proposition 3.6

To achieve the first conclusion, for each  $d \in [D]$ , apply Corollary M.2 with  $\delta/D$  in place of  $\delta$  to the random variable

$$\frac{1}{M} \sum_{m=1}^M w_d(Z_m, Q_N).$$

The first claim follows by plugging in the high probability lower bounds from Corollary M.2 into  $\text{R}\Phi\text{SD}_{\Phi, r, \nu, M}^2(Q_N, P)$  and using the union bound.

The equality  $\mathbb{E}[Y_d] = \Phi\text{SD}_{\Phi, r}^r(Q_N, P)$ , the KSD- $\Phi\text{SD}$  inequality of Proposition 3.1 ( $\Phi\text{SD}_{\Phi, r}^r(Q_N, P) \geq \text{KSD}_k^r(Q_N, P) \|\rho\|_{L^t}^{-r/2}$ ), and the assumption  $\text{KSD}_k(Q_N, P) \gtrsim N^{-1/2}$  imply that  $\mathbb{E}[Y_d] \gtrsim N^{-r/2} \|\rho\|_{L^t}^{-r/2}$ . Plugging this estimate into the initial importance sample size requirement and applying the KSD- $\Phi\text{SD}$  inequality once more yield the second claim.

## E Proof of Proposition 3.7

It turns out that we obtain  $(C, 1)$  moments whenever the weight functions  $w_d(z, Q_N)$  are bounded. Let  $\mathcal{Q}(\Phi, \nu, C') := \{Q_N \mid \sup_{z, d} w_d(z, Q_N) < C'\}$ .

**Proposition E.1.** *For any  $C > 0$ ,  $(\Phi, r, \nu)$  yields  $(C, 1)$  second moments for  $P$  and  $\mathcal{Q}(\Phi, \nu, C')$ .*

**Proof** It follows from the definition of  $\mathcal{Q}(\Phi, \nu, C)$  that

$$\sup_{Q_N \in \mathcal{Q}(\Phi, \nu, C)} \sup_{d, z} |(Q_N \mathcal{T}_d \Phi)(z)|^r / \nu(z) \leq C.$$

Hence for any  $Q_N \in \mathcal{Q}(\Phi, \nu, C)$  and  $d \in [D]$ ,  $Y_d \leq C$  a.s. and thus

$$\mathbb{E}[Y_d^2] \leq C' \mathbb{E}[Y_d].$$

□

Thus, to prove Proposition 3.7 it suffices to have uniform bound for  $w_d(z, Q_N)$  for all  $Q_N \in \mathcal{Q}(C')$ . Let  $\sigma(x) := 1 + \|x\|$  and fix some  $Q \in \mathcal{Q}(C')$ . Then  $\nu(z) = Q_N(\sigma\Phi(\cdot, z))/C(Q_N)$ , where  $C(Q_N) := \|F\|_{L^1} Q(\sigma A(\cdot - m_N)) \leq \|F\|_{L^1} C'$ . Moreover, for  $c, c' > 0$  not depending on  $Q_N$ ,

$$\begin{aligned} |(Q_N \mathcal{T}_d \Phi)(z)|^r &\leq Q_N(|\partial_d \log p + \partial_d \log A(\cdot - m_N) + \partial_d \log F(\cdot - z)| \Phi(\cdot, z))^r \\ &\leq c Q_N(\|1 + \|\cdot\| + \|\cdot - m_N\|^a |\Phi(\cdot, z)|)^r \\ &\leq c' (C')^{r-1} Q_N(\sigma\Phi(\cdot, z)). \end{aligned}$$

Thus,

$$w_d(z, Q_N) = \frac{|(Q_N \mathcal{T}_d \Phi)(z)|^r}{\nu(z)} \leq \frac{C(Q) c' (C')^{r-1} Q_N(\sigma\Phi(\cdot, z))}{Q_N(\sigma\Phi(\cdot, z))} \leq c' (C')^r \|F\|_{L^1}.$$

## F Technical Lemmas

**Lemma F.1.** *If  $P \in \mathcal{P}$ , Assumptions A to D hold, and (3) holds, then for any  $\lambda \in (1/2, \bar{\lambda})$ ,*

$$|(Q_N \mathcal{T}_d \Phi)(z)| \leq C_{\lambda, C} \text{KSD}_{k_d}^{2\lambda-1}.$$

**Proof** Let  $\varsigma_d(\omega) := (1 + \omega_d)^{-1} Q_N(\mathcal{T}_d A(\cdot - m_N) e^{-i\omega \cdot})$ . Applying Proposition H.1 with  $\mathcal{D} = Q_N \mathcal{T}_d A(\cdot - m_N)$ ,  $h = F$ ,  $\varrho(\omega) = 1 + \omega_d$ , and  $t = 1/2$  yields

$$|(Q_N \mathcal{T}_d \Phi)(z)| \leq \|F\|_{\Psi(\lambda)} \left( \|\varsigma_d\|_{L^\infty} \|(1 + \partial_d) \Psi^{(1/4)}\|_{L^2} \right)^{2-2\lambda} \|Q_N \mathcal{T}_d \Phi\|_{\Psi}^{2\lambda-1}$$

The finiteness of  $\|F\|_{\Psi(\lambda)}$  follows from Assumption C. Using  $P \in \mathcal{P}$ , Assumption A, and (3) we have

$$\begin{aligned} \varsigma_d(\omega) &= (1 + \omega_d)^{-1} Q_N([\partial_d \log p + \partial_d \log A(\cdot - m_N) - i\omega_d] A(\cdot - m_N) e^{-i\omega \cdot}) \\ &\leq C Q_N([1 + \|\cdot\|] A(\cdot - m_N)) \\ &\leq C C', \end{aligned}$$

so  $\|\varsigma_d\|_{L^\infty}$  is finite. The finiteness of  $\|(1 + \partial_d)\Psi^{(1/4)}\|_{L^2}$  follows from the Plancherel theorem and Assumption D. The result now follows upon noting that  $\|Q_N \mathcal{T}_d \Phi\|_\Psi = \text{KSD}_{k_d}$ .  $\square$

**Lemma F.2.** *If  $P \in \mathcal{P}$ , Assumptions A and B hold, and (3) holds, then for some  $b \in [0, 1)$ ,  $C_b > 0$ ,*

$$|Q_N \mathcal{T}_d \Phi(z)| \leq C_b F(z - m_N)^{1-b}.$$

Moreover,  $b = 0$  if  $s = 0$ .

**Proof** We have (with  $C$  a constant changing line to line)

$$\begin{aligned} |Q_N \mathcal{T}_d \Phi(z)| &\leq Q_N |\mathcal{T}_d \Phi(\cdot, z)| \\ &= Q_N (|\partial_d \log p + \partial_d \log A(\cdot - m_N) + \partial_d \log F(\cdot - z)| A(\cdot - m_N) F(\cdot - z)) \\ &\leq C Q_N (|1 + \|\cdot\| + \|\cdot - z\|^s| A(\cdot - m_N) F(\cdot - m_N)^{-1}) F(z - m_N) \\ &\leq C Q_N (|1 + \|\cdot\| + \|\cdot - m_N\|^s + \|z - m_N\|^s| A(\cdot - m_N) F(\cdot - m_N)^{-1}) F(z - m_N) \\ &\leq C C (1 + \|z - m_N\|^s) F(z - m_N). \end{aligned}$$

By assumption  $(1 + \|z\|^s)F(z) \rightarrow 0$  as  $\|z\| \rightarrow \infty$ , so for some  $C_b > 0$  and  $b \in [0, 1)$ ,  $(1 + \|z - m_N\|^s) \leq C_b F(z)^{-b}$ .  $\square$

## G Proof of Theorem 3.8: $(C, \gamma)$ second moment bounds for RΦSD

Take  $Q_N \in \mathcal{Q}(\mathcal{C})$  fixed and let  $w_d(z) := w_d(z, Q_N)$ . For a set  $S$  let  $\nu_S(S') := \int_{S \cap S'} \nu(dz)$ . Let  $K := \{x \in \mathbb{R}^D \mid \|x - m_N\| \leq R\}$ . Recall that  $Z \sim \nu$  and  $Y_d = w_d(Z)$ . We have

$$\begin{aligned} \mathbb{E}[Y_d^2] &= \mathbb{E}[w_d(Z)^2] = \mathbb{E}[w_d(Z)^2 \mathbf{1}(Z \in K)] + \mathbb{E}[w_d(Z)^2 \mathbf{1}(Z \notin K)] \\ &\leq \|w_d\|_{L^1(\nu)} \|w_d \mathbf{1}(\cdot \in K)\|_{L^\infty(\nu)} + \|\mathbf{1}(\cdot \notin K)\|_{L^1(\nu)} \|w_d^2 \mathbf{1}(\cdot \notin K)\|_{L^\infty(\nu)} \\ &= \|Q_N \mathcal{T}_d \Phi\|_{L^r}^r \sup_{z \in K} w_d(z) + \nu(K^c) \sup_{z \in K^c} w_d(z)^2 \\ &= \mathbb{E}[Y_d] \sup_{z \in K} w_d(z) + \nu(K^c) \sup_{z \in K^c} w_d(z)^2 \end{aligned}$$

Without loss of generality we can take  $\nu(z) = \Psi(z - m_N)^{\xi r} / \|\Psi^{\xi r}\|_{L^1}$ , since a different choice of  $\nu$  only affects constant factors. Applying Lemma F.1, Assumption D, and (2), we have

$$\begin{aligned} \sup_{z \in K} w_d(z) &\leq C_{\lambda, \mathcal{C}}^r \text{KSD}_{k_d}^{r(2\lambda-1)} \sup_{z \in K} \nu(z)^{-1} \\ &\leq C_{\lambda, \mathcal{C}}^r \|\Psi^{\xi r}\|_{L^1} \sup_{z \in K} F(z - m_N)^{-\xi r} \text{KSD}_{k_d}^{r(2\lambda-1)} \\ &\leq C_{\lambda, \mathcal{C}}^r \underline{c}^{-\xi r} \|\Psi^{\xi r}\|_{L^1} \|\hat{\Psi}/\hat{F}^2\|_{L^t} f(R)^{-\xi r} \|Q_N \mathcal{T}_d \Phi\|_{L^r}^{r(2\lambda-1)} \\ &= C_{\lambda, \mathcal{C}}^r \|(\Psi/\underline{c})^{\xi r}\|_{L^1} \|\hat{\Psi}/\hat{F}^2\|_{L^t} f(R)^{-\xi r} \mathbb{E}[Y_d]^{2\lambda-1}. \end{aligned}$$

Applying Lemma F.2 we have

$$\begin{aligned} \sup_{z \in K^c} w_d(z)^2 &\leq C_b^2 \sup_{z \in K^c} F(z - m_N)^{2(1-b)r} / \nu(z)^2 \\ &= C_b^2 \|\Psi^{\xi r}\|_{L^1}^2 \sup_{z \in K^c} F(z - m_N)^{2(1-b-\xi)r} \\ &= C_b^2 \|\Psi^{\xi r}\|_{L^1}^2 f(R)^{2(1-b-\xi)r}. \end{aligned}$$

Thus, we have that

$$\mathbb{E}[Y_d^2] \leq C_{\lambda, \mathcal{C}, r, \xi} \mathbb{E}[Y_d]^{2\lambda} f(R)^{-\xi r} + C_{b, \xi r} f(R)^{2(1-b-\xi)r}.$$

As long as  $\mathbb{E}[Y_d]^{2\lambda} \leq C_{b, \xi r} f(0)^{2(1-b-\xi/2)r} / C_{\lambda, \mathcal{C}, r, \xi}$ , since  $f$  is continuous and non-increasing to zero we can choose  $R$  such that  $f(R)^{2(1-b-\xi)r} = C_{\lambda, \mathcal{C}, r, \xi} \mathbb{E}[Y_d]^{2\lambda} / C_{b, \xi r}$  and the result follows for

$$\mathbb{E}[Y_d]^{2\lambda} \leq C_{b, \xi r} f(0)^{2(1-b-\xi/2)r} / C_{\lambda, \mathcal{C}, r, \xi}.$$

Otherwise, we can guarantee that  $\mathbb{E}[Y_d^2] \leq C_\alpha \mathbb{E}[Y_d]^{2-\gamma_\alpha}$  be choosing  $C_\alpha$  sufficiently large, since by assumption  $\mathbb{E}[Y_d]$  is uniformly bounded over  $Q_N \in \mathcal{Q}(\mathcal{C})$ .

## H A uniform MMD-type bound

Let  $\mathcal{D}$  denote a tempered distribution and  $\Psi$  a stationary kernel. Also, define  $\hat{\mathcal{D}}(\omega) := \mathcal{D}_x e^{-i\langle \omega, \hat{x} \rangle}$ .

**Proposition H.1.** *Let  $h$  be a symmetric function such that for some  $s \in (0, 1]$ ,  $h \in \mathcal{K}_{\Psi(s)}$  and  $\mathcal{D}_x h(\hat{x} - \cdot) \in \mathcal{K}_{\Psi(s)}$ . Then*

$$|\mathcal{D}_x h(\hat{x} - z)| \leq \|h\|_{\Psi(s)} \left\| \mathcal{D}_x \Psi^{(s)}(\hat{x} - \cdot) \right\|_{\Psi(s)}$$

and for any  $t \in (0, s)$  any function  $\varrho(\omega)$ ,

$$\left\| \mathcal{D}_x \Psi^{(s)}(\hat{x} - \cdot) \right\|_{\Psi(s)}^{1-t} \leq \left( \left\| \varrho^{-1} \hat{\mathcal{D}} \right\|_{L^\infty} \left\| \varrho \hat{\Psi}^{t/2} \right\|_{L^2} \right)^{1-s} \left\| \mathcal{D}_x \Psi(\hat{x} - \cdot) \right\|_{\Psi}^{s-t}.$$

Furthermore, if for some  $c > 0$  and  $r \in (0, s/2)$ ,  $\hat{h} \leq c \hat{\Psi}^r$ , then

$$\|h\|_{\Psi(s)} \leq \frac{c \|\Psi^{(r-s/2)}\|_{L^2}}{(2\pi)^{d/4}}.$$

**Proof** The first inequality follows from an application of Cauchy-Schwartz:

$$\begin{aligned} |\mathcal{D}_x h(\hat{x} - z)| &= |\langle h(\cdot - z), \mathcal{D}_x \Psi^{(s)}(\hat{x} - \cdot) \rangle_{\Psi(s)}| \\ &\leq \|h(\cdot - z)\|_{\Psi(s)} \left\| \mathcal{D}_x \Psi^{(s)}(\hat{x} - \cdot) \right\|_{\Psi(s)} \\ &= \|h\|_{\Psi(s)} \left\| \mathcal{D}_x \Psi^{(s)}(\hat{x} - \cdot) \right\|_{\Psi(s)}. \end{aligned}$$

For the first norm, we have

$$\begin{aligned} \|h\|_{\Phi(s)}^2 &= (2\pi)^{-d/2} \int \frac{\hat{h}^2(\omega)}{\hat{\Phi}^s(\omega)} d\omega \\ &\leq c^2 (2\pi)^{-d/2} \int \hat{\Phi}^{2r-s}(\omega) d\omega \\ &= c^2 (2\pi)^{-d/2} \left\| \Psi^{(r-s/2)} \right\|_{L^2}^2. \end{aligned}$$

Note that by the convolution theorem  $\mathcal{F}(\mathcal{D}_x \Psi^{(s)}(\hat{x} - \cdot))(\omega) = \hat{\mathcal{D}}(\omega) \hat{\Psi}^s(\omega)$ . For the second norm, applying Jensen's inequality and Hölder's inequality yields

$$\begin{aligned} \left\| \mathcal{D}_x \Psi^{(s)}(\hat{x} - \cdot) \right\|_{\Psi(s)}^2 &= (2\pi)^{-d/2} \int \frac{\hat{\Psi}(\omega)^{2s} |\hat{\mathcal{D}}(\omega)|^2}{\hat{\Psi}^s(\omega)} d\omega \\ &= (2\pi)^{-d/2} \left( \int \hat{\Psi}^t |\hat{\mathcal{D}}|^2 \right) \int \frac{\hat{\Psi}(\omega)^t |\hat{\mathcal{D}}(\omega)|^2}{\int \hat{\Psi}^t |\hat{\mathcal{D}}|^2} \hat{\Psi}(\omega)^{s-t} d\omega \\ &\leq (2\pi)^{-d/2} \left( \int \hat{\Psi}^t |\hat{\mathcal{D}}|^2 \right) \left( \int \frac{\hat{\Psi}(\omega)^t |\hat{\mathcal{D}}(\omega)|^2}{\int \hat{\Psi}^t |\hat{\mathcal{D}}|^2} \Psi(\omega)^{1-t} d\omega \right)^{\frac{s-t}{1-t}} \\ &= \left( \int \hat{\Psi}^t |\hat{\mathcal{D}}|^2 \right)^{\frac{1-s}{1-t}} \left\| \mathcal{D}_x \Psi(\hat{x} - \cdot) \right\|_{\Psi}^{\frac{2(s-t)}{1-t}} \\ &\leq \left( \left\| \varrho^{-1} \hat{\mathcal{D}} \right\|_{L^\infty}^2 \int \varrho^2 \hat{\Psi}^t \right)^{\frac{1-s}{1-t}} \left\| \mathcal{D}_x \Psi(\hat{x} - \cdot) \right\|_{\Psi}^{\frac{2(s-t)}{1-t}} \\ &= \left( \left\| \varrho^{-1} \hat{\mathcal{D}} \right\|_{L^\infty}^2 \left\| \varrho \hat{\Psi}^{t/2} \right\|_{L^2}^2 \right)^{\frac{1-s}{1-t}} \left\| \mathcal{D}_x \Psi(\hat{x} - \cdot) \right\|_{\Psi}^{\frac{2(s-t)}{1-t}}. \end{aligned}$$

□

## I Verifying Example 3.3: Tilted hyperbolic secant RΦSD properties

We verify each of the assumptions in turn. By construction or assumption each condition in Assumption A holds. Note in particular that  $\Psi_{2a}^{\text{sech}} \in C^\infty$ . Since  $e^{-a|x_d|} \leq \text{sech}(ax_d) \leq 2e^{-a|x_d|}$ , Assumption B holds with  $\|\cdot\| = \|\cdot\|_1$ ,  $f(R) = 2^d e^{-\sqrt{\frac{\pi}{2}} a R}$ , and  $\underline{c} = 2^{-d}$ , and  $s = 1$ . In particular,

$$\begin{aligned} \partial_{x_d} \log \Psi_{2a}^{\text{sech}}(x) &= \sqrt{2\pi} a \tanh(\sqrt{2\pi} a x_d) + \sum_{d' \neq d}^D \log \text{sech}(\sqrt{2\pi} a x_{d'}) \\ &\leq (\sqrt{2\pi} a)(1 + \sum_{d' \neq d}^D |x_{d'}|) \\ &\leq (\sqrt{2\pi} a)(1 + \|x\|_1) \end{aligned}$$

and using Proposition L.3 we have that

$$\Psi_a^{\text{sech}}(x - z) \leq e^{\sqrt{\frac{\pi}{2}} a \|x\|_1} \Psi_a^{\text{sech}}(z) \leq 2^d \Psi_a^{\text{sech}}(z) / \Psi_a^{\text{sech}}(x).$$

Assumption C holds with  $\bar{\lambda} = 1$  since for any  $\lambda \in (0, 1)$ , it follow from Proposition L.2 that

$$\widehat{f}_j / \widehat{\Phi}_j^{\lambda/2} = \widehat{\Psi}_{2a}^{\text{sech}} / (\widehat{\Psi}_a^{\text{sech}})^{\lambda/2} \leq 2^{d/2} (\widehat{\Psi}_{2a}^{\text{sech}})^{1-\lambda} \in L^2.$$

The first part of Assumption D holds as well since by (6),  $\omega_d^2 \widehat{\Psi}_a^{\text{sech}}(\omega) = a^{-D} \omega_d^2 \Psi_{1/a}^{\text{sech}}(\omega) \in L^1$ .

Finally, to verify the second part of Assumption D, we first note that since  $r = 2$ ,  $t = \infty$ . The assumption holds since by Proposition L.2,  $\widehat{\Psi}_a^{\text{sech}}(\omega) / \widehat{\Psi}_{2a}^{\text{sech}}(\omega)^2 \leq 1$ .

## J Verifying Example 3.4: IMQ RΦSD properties

We verify each of the assumptions in turn. By construction or assumption each condition in Assumption A holds. Note in particular that  $\Psi_{c',\beta'}^{\text{IMQ}} \in C^\infty$ . Assumption B holds with  $\|\cdot\| = \|\cdot\|_2$ ,  $f(R) = ((c')^2 + R^2)^{\beta'}$ ,  $\underline{c} = 1$ , and  $s = 0$ . In particular,

$$|\partial_{x_d} \log \Psi_{c',\beta'}^{\text{IMQ}}(x)| \leq -\frac{2\beta' |x_d|}{(c')^2 + \|x\|_2^2} \leq -2\beta'$$

and

$$\begin{aligned} \frac{\Psi_{c',\beta'}^{\text{IMQ}}(x - z)}{\Psi_{c',\beta'}^{\text{IMQ}}(z)} &= \left( \frac{(c')^2 + \|x - z\|_2^2}{(c')^2 + \|z\|_2^2} \right)^{-\beta'} \\ &\leq \left( \frac{(c')^2 + 2\|z\|_2^2 + 2\|x\|_2^2}{(c')^2 + \|z\|_2^2} \right)^{-\beta'} \\ &\leq \left( 2 + 2\|x\|_2^2 / (c')^2 \right)^{-\beta'} \\ &= 2^{-\beta} \Psi_{c',\beta'}^{\text{IMQ}}(x)^{-1}. \end{aligned}$$

By Wendland [29, Theorem 8.15],  $\Psi_{c,\beta}^{\text{IMQ}}$  has generalized Fourier transform

$$\widehat{\Psi_{c,\beta}^{\text{IMQ}}}(\omega) = \frac{2^{1+\beta}}{\Gamma(-\beta)} \left( \frac{\|\omega\|_2}{c} \right)^{-\beta-D/2} K_{\beta+D/2}(c\|\omega\|_2),$$

where  $K_v(z)$  is the modified Bessel function of the third kind. We write  $a(\ell) \sim b(\ell)$  to denote asymptotic equivalence up to a constant:  $\lim_{\ell} a(\ell)/b(\ell) = c$  for some  $c \in (0, \infty)$ . Asymptotically [1, eq. 10.25.3],

$$\begin{aligned} \widehat{\Psi}_{c,\beta}^{\text{IMQ}}(\omega) &\sim \|\omega\|_2^{-\beta-D/2-1/2} e^{-c\|\omega\|_2}, & \|\omega\|_2 \rightarrow \infty \quad \text{and} \\ \widehat{\Psi}_{c,\beta}^{\text{IMQ}}(\omega) &\sim \|\omega\|_2^{-(\beta+D/2)-|\beta+D/2|} = \|\omega\|_2^{-(2\beta+D)+} & \|\omega\|_2 \rightarrow 0. \end{aligned}$$

Assumption C holds since for any  $\lambda \in (0, \bar{\lambda})$ ,

$$\begin{aligned}\hat{\Psi}_{c',\beta'}^{\text{IMQ}}/(\hat{\Psi}_{c,\beta}^{\text{IMQ}})^{\lambda/2} &\sim \|\omega\|_2^{-(\beta'+D/2-1/2)+(\beta+D/2-1/2)\lambda/2} e^{(-c'+c\lambda/2)\|\omega\|_2}, \quad \|\omega\|_2 \rightarrow \infty \quad \text{and} \\ &\sim \|\omega\|_2^{\lambda(2\beta+D)+/2-(2\beta'+D)+} = \|\omega\|_2^{\lambda(2\beta+D)/2} \quad \|\omega\|_2 \rightarrow 0,\end{aligned}$$

so  $\hat{\Psi}_{c',\beta'}^{\text{IMQ}}/(\hat{\Psi}_{c,\beta}^{\text{IMQ}})^{\lambda/2} \in L^2$  as long as  $c' = c\bar{\lambda}/2 > c\lambda/2$  and  $\lambda(2\beta+D) > -D$ . The first condition holds by construction and second condition is always satisfied, since  $2\beta+D \geq 0 > -D$ .

The first part of Assumption D holds as well since  $\hat{\Psi}_{c',\beta'}^{\text{IMQ}}(\omega)$  decreases exponentially as  $\|\omega\|_2 \rightarrow \infty$  and  $\hat{\Psi}_{c',\beta'}^{\text{IMQ}}(\omega) \sim 1$  as  $\|\omega\|_2 \rightarrow 0$ , so  $\omega_d^2 \hat{\Psi}_{c',\beta'}^{\text{IMQ}}(\omega)$  is integrable.

Finally, to verify the second part of Assumption D we first note that  $t = r/(2-r) = -D/(D+4\beta'\xi)$ . Thus,

$$\begin{aligned}\hat{\Psi}_{c,\beta}^{\text{IMQ}}/(\hat{\Psi}_{c',\beta'}^{\text{IMQ}})^2 &\sim \|\omega\|_2^{-2(\beta+D/2-1/2)/2+2(\beta'+D/2-1/2)} e^{2(-c/2+c')\|\omega\|_2}, \quad \|\omega\|_2 \rightarrow \infty \quad \text{and} \\ &\sim \|\omega\|_2^{2(2\beta'+D)+-(2\beta+D)+} = \|\omega\|_2^{-(2\beta+D)} \quad \|\omega\|_2 \rightarrow 0,\end{aligned}$$

so  $\hat{\Psi}_{c,\beta}^{\text{IMQ}}/(\hat{\Psi}_{c',\beta'}^{\text{IMQ}})^2 \in L^t$  whenever  $c/2 > c'$  and

$$\frac{D}{(D+4\beta'\xi)}(2\beta+D) > -D \Leftrightarrow -\beta/(2\xi) - D/(2\xi) > \beta'.$$

Both these conditions hold by construction.

## K Proofs of Proposition 4.1 and Theorem 4.3: Asymptotics of RΦSD

The proofs of Proposition 4.1 and Theorem 4.3 rely on the following asymptotic result.

**Theorem K.1.** Let  $\xi_i : \mathbb{R}^D \times \mathcal{Z} \rightarrow \mathbb{R}, i = 1, \dots, I$ , be a collection of functions; let  $Z_{N,m} \stackrel{\text{indep}}{\sim} \nu_N$ , where  $\nu_N$  is a distribution on  $\mathcal{Z}$ ; and let  $X_n \stackrel{\text{i.i.d.}}{\sim} \mu$ , where  $\mu$  is absolutely continuous with respect to Lebesgue measure. Define the random variables  $\xi_{N,nim} := \xi_i(X_n, Z_{N,m})$  and, for  $r, s \geq 1$ , the random variable

$$F_{r,s,N} := \left( \sum_{i=1}^I \left( \sum_{m=1}^M \left| N^{-1} \sum_{n=1}^N \xi_{N,nim} \right|^r \right)^{s/r} \right)^{2/s}.$$

Assume that for all  $N \geq 1$ ,  $i \in [I]$ , and  $m \in [M]$ ,  $\xi_{N,1im}$  has a finite second moment that that  $\Sigma_{im,i'm'} := \lim_{N \rightarrow \infty} \text{Cov}(\xi_{N,im}, \xi_{N,i'm'}) < \infty$  exists for all  $i, i' \in [I]$  and  $m, m' \in [M]$ . Then the following statements hold.

1. If  $\varrho_{N,im} := (\mu \times \nu_N)(\xi_i) = 0$  for all  $i \in [I]$  then

$$NF_{r,s,N} \xrightarrow{\mathcal{D}} \left( \sum_{i=1}^I \left( \sum_{m=1}^M |\zeta_{im}|^r \right)^{s/r} \right)^{2/s} \quad \text{as } N \rightarrow \infty, \quad (5)$$

where  $\zeta \sim \mathcal{N}(0, \Sigma)$ .

2. If  $\varrho_{N,im} \neq 0$  for some  $i$  and  $m$ , then

$$NF_{r,s,N} \xrightarrow{a.s.} \infty \quad \text{as } N \rightarrow \infty.$$

**Proof** Let  $V_{N,im} = N^{-1/2} \sum_{n=1}^N \xi_{N,nim}$ . By assumption  $\|\Sigma\| < \infty$ . Hence, by the multivariate CLT,

$$V_N - N^{1/2} \varrho_N \xrightarrow{\mathcal{D}} \mathcal{N}(0, \Sigma).$$

Observe that  $NF_{r,s,N} = (\sum_{i=1}^I (\sum_{m=1}^M |V_{N,im}|^r)^{s/r})^{2/s}$ . Hence if  $\varrho = 0$ , (5) follows from the continuous mapping theorem.

Assume  $\varrho_{N,ij} \neq 0$  for some  $i$  and  $j$  and all  $N \geq 0$ . By the strong law of large numbers,  $N^{-1/2} V_N \xrightarrow{a.s.} \varrho_\infty$ . Together with the continuous mapping theorem conclude that  $F_{r,s,N} \xrightarrow{a.s.} c$  for



some  $c > 0$ . Hence  $NF_{r,s,N} \xrightarrow{a.s.} \infty$ .  $\square$

When  $r = s = 2$ , the RΦSD is a degenerate  $V$ -statistic, and we recover its well-known distribution [24, Sec. 6.4, Thm. B] as a corollary. A similar result was used in Jitkrittum et al. [16] to construct the asymptotic null for the FSSD, which is degenerate  $U$ -statistic.

**Corollary K.2.** *Under the hypotheses of Theorem K.1(1),*

$$NF_{2,2,N} \xrightarrow{\mathcal{D}} \sum_{i=1}^I \sum_{m=1}^M \lambda_{im} \omega_{im}^2 \text{ as } N \rightarrow \infty,$$

where  $\lambda = \text{eigs}(\Sigma)$  and  $\omega_{ij} \stackrel{i.i.d.}{\sim} \mathcal{N}(0, 1)$ .

To apply these results to RΦSDs, take  $s = 2$  and apply Theorem K.1 with  $I = D$ ,  $\xi_{N,dm} = \xi_{r,N,dm}$ . Under  $H_0 : \mu = P$ ,  $P(\xi_{r,N,dm}) = 0$  for all  $d \in [D]$  and  $m \in [M]$ , so part 1 of Theorem K.1 holds. On the other hand, when  $\mu \neq P$ , there exists some  $m$  and  $d$  for which  $\mu(\xi_{r,dm}) \neq 0$ . Thus, under  $H_1 : \mu \neq P$  part 2 of Theorem K.1 holds.

The proof of Theorem 4.3 is essentially identical to that of Jitkrittum et al. [16, Theorem 3].

## L Hyperbolic secant properties

Recall that the hyperbolic secant function is given by  $\text{sech}(a) = \frac{2}{e^a + e^{-a}}$ . For  $x \in \mathbb{R}^d$ , define the hyperbolic secant kernel

$$\Psi_a^{\text{sech}}(x) := \text{sech}\left(\sqrt{\frac{\pi}{2}} ax\right) := \prod_{i=1}^d \text{sech}\left(\sqrt{\frac{\pi}{2}} ax_i\right).$$

It is a standard result that

$$\hat{\Psi}_a^{\text{sech}}(\omega) = a^{-D} \Psi_{1/a}^{\text{sech}}(\omega). \quad (6)$$

We can relate  $\Psi_a^{\text{sech}}(x)^\xi$  to  $\Psi_{a\xi}^{\text{sech}}(x)$ , but to do so we will need the following standard result:

**Lemma L.1.** *For  $a, b \geq 0$  and  $\xi \in (0, 1]$ ,*

$$\frac{a^\xi + b^\xi}{2^{1-\xi}} \leq (a + b)^\xi \leq a^\xi + b^\xi.$$

**Proof** The lower bound follows from an application of Jensen's inequality and the upper bound follows from the concavity of  $a \mapsto a^\xi$ .  $\square$

**Proposition L.2.** *For  $\xi \in (0, 1]$ ,*

$$\begin{aligned} \Psi_a^{\text{sech}}(x)^\xi &\leq \Psi_a^{\text{sech}}(\xi x) = \Psi_{a\xi}^{\text{sech}}(x) \leq 2^{d(1-\xi)} \Psi_a^{\text{sech}}(x)^\xi \\ 2^{-d(1-\xi)} \hat{\Psi}_{a/\xi}^{\text{sech}}(x) &\leq \hat{\Psi}_a^{\text{sech}}(x)^\xi \leq \hat{\Psi}_{a/\xi}^{\text{sech}}(x). \end{aligned}$$

Thus,  $\Psi_{a/\xi}^{\text{sech}}$  is equivalent to  $(\Psi_a^{\text{sech}})^\xi$ .

**Proof** Apply Lemma L.1 and (6).  $\square$

**Proposition L.3.** *For all  $x, y \in \mathbb{R}^d$  and  $a > 0$ ,*

$$\Psi_a^{\text{sech}}(x - z) \leq e^{\sqrt{\frac{\pi}{2}} a \|x\|_1} \Psi_a^{\text{sech}}(z).$$

**Proof** Take  $d = 1$  since the general case follows immediately. Without loss of generality assume that  $x \geq 0$  and let  $a' = \sqrt{\frac{\pi}{2}} a$ . Then

$$\frac{\Psi_a^{\text{sech}}(x - z)}{\Psi_a^{\text{sech}}(z)} = \frac{e^{a'z} + e^{-a'z}}{e^{a'(x-z)} + e^{-a'(x-z)}} = \frac{e^{a'z} + e^{-a'z}}{e^{-a'z} + e^{2a'x} e^{a'z}} e^{a'x} \leq e^{a'x}.$$

$\square$

## M Concentration inequalities

**Theorem M.1** (Chung and Lu [5, Theorem 2.9]). *Let  $X_1, \dots, X_m$  be independent random variables satisfying  $X_i > -A$  for all  $i = 1, \dots, m$ . Let  $X := \sum_{i=1}^m X_i$  and  $\bar{X}^2 := \sum_{i=1}^m \mathbb{E}[X_i^2]$ . Then for all  $t > 0$ ,*

$$\mathbb{P}(X \leq \mathbb{E}[X] - t) \leq e^{-\frac{1}{2}t^2/(\bar{X}^2 + At/3)}.$$

Let  $\hat{X} := \frac{1}{m} \sum_{i=1}^m X_i$ .

**Corollary M.2.** *Let  $X_1, \dots, X_m$  be i.i.d. nonnegative random variables with mean  $\bar{X} := \mathbb{E}[X_1]$ . Assume there exist  $c > 0$  and  $\gamma \in [0, 2]$  such that  $\mathbb{E}[X_1^2] \leq c\bar{X}^{2-\gamma}$ . If, for  $\delta \in (0, 1)$  and  $\varepsilon \in (0, 1)$ ,*

$$m \geq \frac{2c \log(1/\delta)}{\varepsilon^2} \bar{X}^{-\gamma},$$

*then with probability at least  $1 - \delta$ ,  $\hat{X} \geq (1 - \varepsilon)\bar{X}$ .*

**Proof** Applying Theorem M.1 with  $t = m\varepsilon\bar{X}$  and  $A = 0$  yields

$$\mathbb{P}(\hat{X} \leq (1 - \varepsilon)\bar{X}) \leq e^{-\frac{1}{2}\varepsilon^2 m \bar{X}^2 / (c\mathbb{E}[X_1^2])} \leq e^{-\frac{1}{2c}\varepsilon^2 m \bar{X}^\gamma}.$$

Upper bounding the right hand side by  $\delta$  and solving for  $m$  yields the result.  $\square$

**Corollary M.3.** *Let  $X_1, \dots, X_m$  be i.i.d. nonnegative random variables with mean  $\bar{X} := \mathbb{E}[X_1]$ . Assume there exists  $c > 0$  and  $\gamma \in [0, 2]$  such that  $\mathbb{E}[X_1^2] \leq c\bar{X}^{2-\gamma}$ . Let  $\epsilon' = |X^* - \bar{X}|$  and assume  $\epsilon' \leq \eta X^*$  for some  $\eta \in (0, 1)$ . If, for  $\delta \in (0, 1)$ ,*

$$m \geq \frac{2c \log(1/\delta)}{\varepsilon^2} \bar{X}^{-\gamma},$$

*then with probability at least  $1 - \delta$ ,  $\hat{X} \geq (1 - \varepsilon)X^*$ . In particular, if  $\epsilon' \leq \frac{\sigma X^*}{\sqrt{n}}$  and  $X^* \geq \frac{\sigma^2}{\eta^2 n}$ , then with probability at least  $1 - \delta$ ,  $\hat{X} \geq (1 - \varepsilon)X^*$  as long as*

$$m \geq \frac{2c(1 - \eta)^2 \eta^{2\gamma}}{\varepsilon^2 \sigma^{2\gamma} \log(1/\delta)} n^\gamma.$$

**Proof** Apply Corollary M.2 with  $\frac{\varepsilon X^*}{\bar{X}}$  in place of  $\varepsilon$ .  $\square$

**Example M.1.** If we take  $\gamma = 1/4$  and  $\eta = \varepsilon = 1/2$ , then  $X^* \geq \frac{4\sigma^2}{n}$  and  $m \geq \frac{\sqrt{2}c \log(1/\delta)}{\sigma^{1/2}} n^{1/4}$  guarantees that  $\hat{X} \geq \frac{1}{2}X^*$  with probability at least  $1 - \delta$ .
